# Supplementary material for: Mendelian Randomization Study on Amino Acid Metabolism Suggests Tyrosine as Causal Trait for Type 2 Diabetes
Source: MDPI journal article supplement (doi:10.3390/nu12123890), 2020-12-19
Supplement: s1 [file s1]

# **Mendelian Randomization study on amino acid metabolism suggests tyrosine as causal trait for type 2 diabetes**

Susanne Jäger<sup>1,2</sup>, Rafael Cuadrat<sup>1,2</sup>, Clemens Wittenbecher<sup>1,2,3</sup>, Anna Floegel<sup>4</sup>,  
Per Hoffmann<sup>5,6</sup>, Cornelia Prehn<sup>7</sup>, Jerzy Adamski<sup>2,7,8,9</sup>, Tobias Pischon<sup>10,11,12</sup>, Matthias B.  
Schulze<sup>1,2,13\*</sup>

<sup>1</sup> Department of Molecular Epidemiology, German Institute of Human Nutrition Potsdam-Rehbruecke, Nuthetal, Germany.

<sup>2</sup> German Center for Diabetes Research (DZD), Germany.

<sup>3</sup> Department of Nutrition, Harvard T.H. Chan School of Public Health, Boston, MA, United States.

<sup>4</sup> Leibniz Institute for Prevention Research and Epidemiology-BIPS, Bremen, Germany.

<sup>5</sup> Human Genomics Research Group, Department of Biomedicine, University of Basel, Basel, Switzerland.

<sup>6</sup> Institute of Human Genetics, Division of Genomics, Life & Brain Research Centre, University Hospital of Bonn, Bonn, Germany.

<sup>7</sup> Research Unit Molecular Endocrinology and Metabolism, Helmholtz Zentrum München, German Research Center for Environmental Health, Neuherberg, Germany.

<sup>8</sup> Chair of Experimental Genetics, Center of Life and Food Sciences Weihenstephan, Technische Universität München, Freising-Weihenstephan, Germany.

<sup>9</sup> Department of Biochemistry, Yong Loo Lin School of Medicine, National University of Singapore, 8 Medical Drive, Singapore 117597, Singapore

<sup>10</sup> Molecular Epidemiology Research Group, Max Delbrueck Center for Molecular Medicine in the Helmholtz Association (MDC), Berlin, Germany.

<sup>11</sup> Charité – Universitätsmedizin Berlin, corporate member of Freie Universität Berlin, Humboldt-Universität zu Berlin and Berlin Institute of Health (BIH), Berlin, Germany

<sup>12</sup> MDC/BIH Biobank, Max Delbrueck Center for Molecular Medicine in the Helmholtz Association (MDC) and Berlin Institute of Health (BIH), Berlin, Germany

<sup>13</sup> Institute of Nutritional Science, University of Potsdam, Potsdam, Germany.

## **Supplemental Tables**

Table S1 Characteristics of studies included within the DIAGRAM consortium

Table S2 Associations of single genetic instruments used for MR of amino acids traits from EPIC-Potsdam and type 2 diabetes

Table S3 Total causal effects of amino acid traits from EPIC-Potsdam and of type 2 diabetes using independent instruments ( $R^2 < 0.001$ )

Table S4 Total causal effects of amino acid traits from Shin et al. and type 2 diabetes and sensitivity analyses

Table S5 Associations of single genetic instruments used for MR of amino acids traits from Shin et al. and type 2 diabetes

Table S6 Direct causal effects of diabetes associated amino acid traits from Shin et al. and type 2 diabetes

Table S7 Associations of single genetic instruments used for MVMR of amino acids traits from Shin et al. and type 2 diabetes

Table S8 Total causal effects of tyrosine risk of type 2 diabetes using other public data sources

Table S9 Associations of single genetic instruments used for MR of tyrosine from Kettunen et al. and Locke et al. and type 2 diabetes

Table S10 Total causal effects of tyrosine from Shin et al. and other risk factors for type 2 diabetes

Table S11 Instruments from genetic risk score for insulin resistance

Table S12 Total causal effects of insulin resistance on amino acid traits from EPIC-Potsdam

Table S13 Associations of single genetic instruments used for MR of insulin resistance and amino acids traits from EPIC-Potsdam

Table S14 Total causal effects of insulin resistance and single amino acids

Table S15 Associations of single genetic instruments used for MR of insulin resistance and single amino acids

### **Supplemental Figures**

Figure S1 Network structure of amino acids within EPIC-Potsdam

Figure S2 Flow-chart of final study population in EPIC-Potsdam

Figure S3 Example flow charts of inclusion and exclusion of SNPs into the analysis

Figure S4 Manhattan plots visualizing GWAS results for amino acid traits in EPIC-Potsdam

**Table S1 Characteristics of studies included within the DIAGRAM consortium**

See Excel file in Supplement B

Previously published in Mahajan et al. 2018 [1]

**Table S2 Associations of single genetic instruments used for MR of amino acids traits from EPIC-Potsdam and type 2 diabetes**

See Excel file in Supplement B

**Table S3 Total causal effects of amino acid traits from EPIC-Potsdam and of type 2 diabetes using independent instruments ( $R \geq 0.001$ )**

| <b>Amino acid trait</b>       | <b>Instruments</b> | <b>N<br/>(SNPs)*</b> | <b>Beta (SE)<br/>from IVW</b> | <b>P-<br/>Value</b> | <b>Heterogeneity<br/>between SNPs; Q-<br/>statistic, p-value</b> | <b>Directional horizontal<br/>pleiotropy **; Egger-<br/>intercept (SE), p-value</b> | <b>Outlier<br/>detected</b> |
|-------------------------------|--------------------|----------------------|-------------------------------|---------------------|------------------------------------------------------------------|-------------------------------------------------------------------------------------|-----------------------------|
| <b>Glycine</b>                | suggestive         | 2/2                  | -0.006 (0.011)                | 0.621               | no; 0.16, 0.68                                                   | n.a.                                                                                | no                          |
|                               | genome-wide        | 1/1                  | -0.007 (0.011)                | 0.547               | n.a                                                              | n.a                                                                                 | n.a                         |
| <b>Glycine/Serine</b>         | suggestive         | 4/4                  | 0.018 (0.041)                 | 0.663               | yes; 37.0, <0.001                                                | no; 0.04 (0.02), 0.16                                                               | n.a                         |
|                               | genome-wide        | 2/2                  | -0.007 (0.013)                | 0.588               | no; 0.07, 0.79                                                   | n.a.                                                                                | n.a.                        |
| <b>Phenylalanine</b>          | suggestive         | 1/1                  | 0.053 (0.045)                 | 0.237               | n.a.                                                             | n.a.                                                                                | n.a.                        |
| <b>Phenylalanine/Arginine</b> | suggestive         | 2/2                  | 0.043 (0.029)                 | 0.131               | no; 0.39, 0.53                                                   | n.a.                                                                                | no                          |
| <b>Serine/Phenylalanine</b>   | suggestive         | 3/4                  | 0.000 (0.023)                 | 0.995               | no; 0.61, 0.74                                                   | no; 0.08 (0.16), 0.62                                                               | n.a.                        |
| <b>Tryptophan/Glutamine</b>   | suggestive         | 2/2                  | 0.003 (0.029)                 | 0.931               | no; 0.17, 0.68                                                   | n.a.                                                                                | n.a.                        |
| <b>Tyrosine/Methionine</b>    | suggestive         | 3/3                  | -0.024 (0.023)                | 0.296               | yes; 26.5, <0.001                                                | no; 0.10 (0.1), 0.33                                                                | n.a.                        |
|                               | genome-wide        | 1/1                  | -0.141 (0.033)                | <0.001              | n.a.                                                             | n.a.                                                                                | n.a.                        |
| <b>xLeucine/Methionine</b>    | suggestive         | 1/2                  | -0.031 (0.043)                | 0.437               | n.a.                                                             | n.a.                                                                                | n.a.                        |
| <b>Valine/xLeucine</b>        | suggestive         | 1/1                  | -0.012 (0.044)                | 0.777               | n.a.                                                             | n.a.                                                                                | n.a.                        |

IVW, inverse variance weighted method; n.a., not applicable; SE, standard error; T2DM, type 2 diabetes

\* used instruments/suitable instruments available in the GWAS of T2DM [2]

\*\* assessed by MR-Egger (>2 variants needed)

**Table S4 Total causal effects of amino acid traits from Shin et al. and type 2 diabetes and sensitivity analyses**

| <b>Amino acid trait*</b> | <b>N (SNPs)**</b> | <b>Beta (SE) from IVW/Wald ratio method for T2DM*</b> | <b>P-Value</b> | <b>Heterogeneity Q-statistic, p-value</b> | <b>Directional horizontal pleiotropy*** Egger-intercept (SE), p-value</b> |
|--------------------------|-------------------|-------------------------------------------------------|----------------|-------------------------------------------|---------------------------------------------------------------------------|
| Glycine                  | 1                 | -0.05 (0.09)                                          | 0.61           | n.a.                                      | n.a.                                                                      |
| Phenylalanine            | 1                 | 1.28 (0.87)                                           | 0.14           | n.a.                                      | n.a.                                                                      |
| Tryptophan               | 17                | -0.15 (0.47)                                          | 0.74           | yes<br>40.1, 0.0008                       | 0.04 (0.03), 0.19                                                         |
| Tyrosine                 | 3                 | -1.53 (0.57)                                          | 0.008          | no<br>4.5, 0.10                           | 0.07 (0.05), 0.40                                                         |
| Methionine               | 1                 | -1.17 (1.00)                                          | 0.24           | n.a.                                      | n.a.                                                                      |
| Valine                   | 1                 | 2.47 (0.77)                                           | 0.001          | n.a.                                      | n.a.                                                                      |
| Leucine                  | 12                | 0.98 (0.45)                                           | 0.03           | No<br>19.7, 0.05                          | -0.02 (0.01), 0.17                                                        |

IVW, inverse variance weighted method; n.a., not applicable; SE, standard error; T2DM, type 2 diabetes

\* assessed using public data by Shin et al. [3] and Mahajan et al. [2]

\*\* significance threshold =  $5 \times 10^{-8}$  ; clumping threshold  $R^2 \geq 0.001$

\*\*\* assessed by MR-Egger (>2 variants needed)

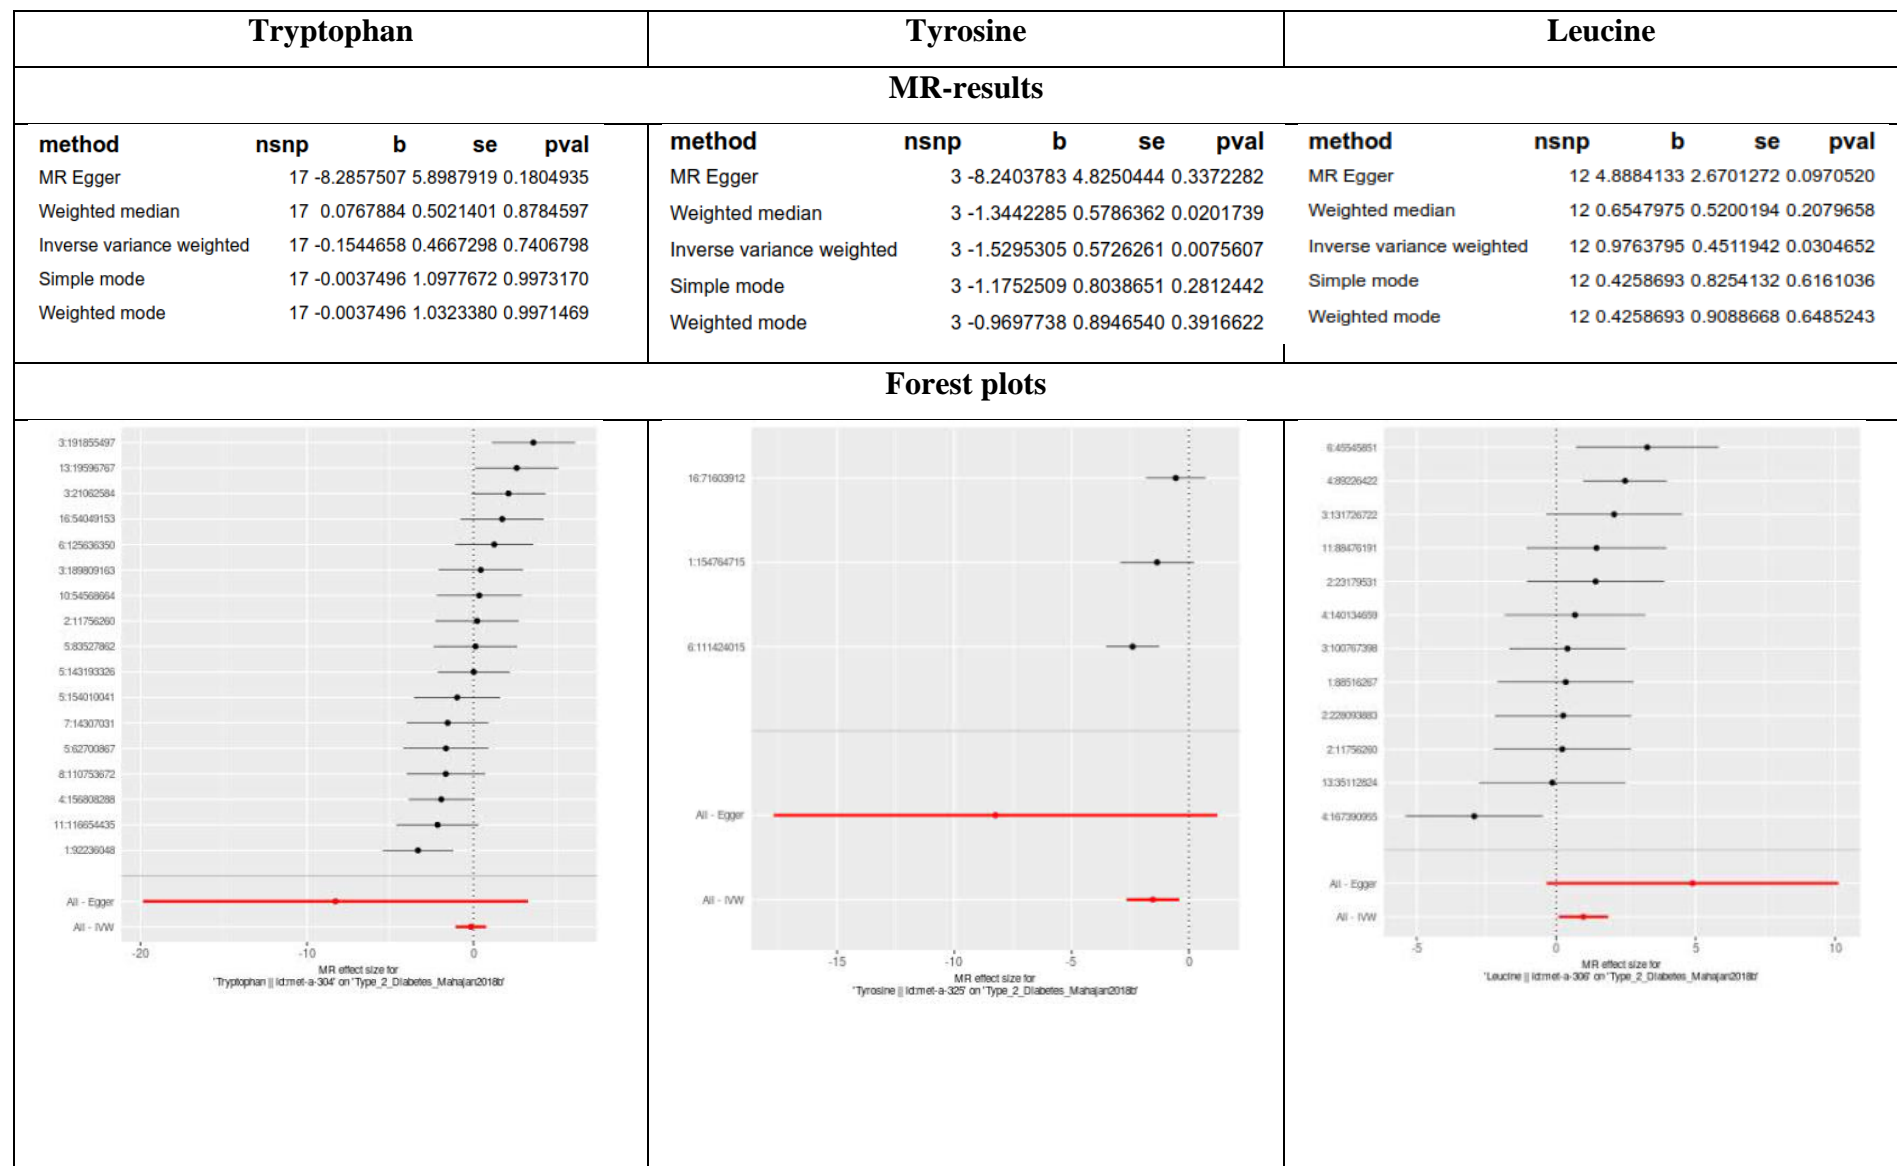

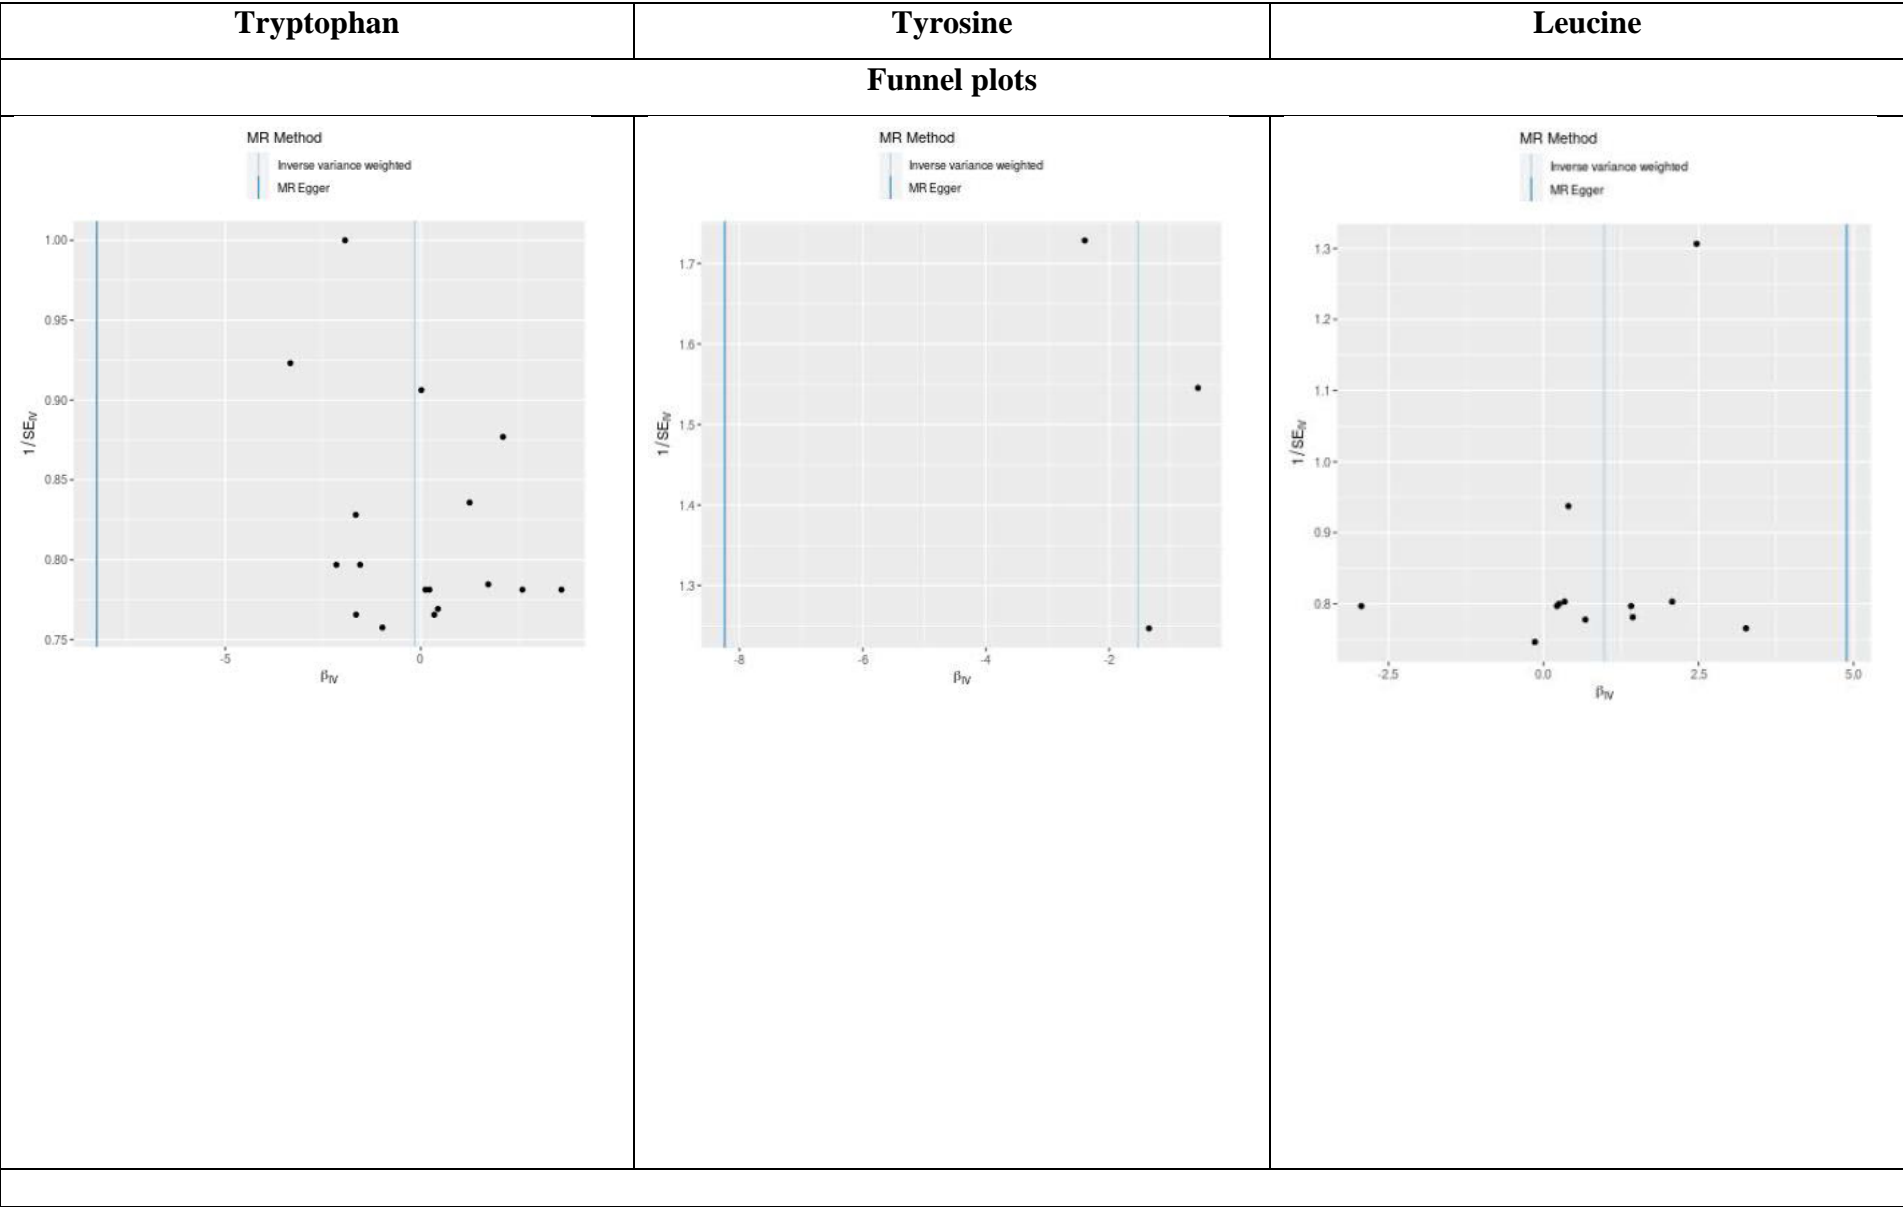



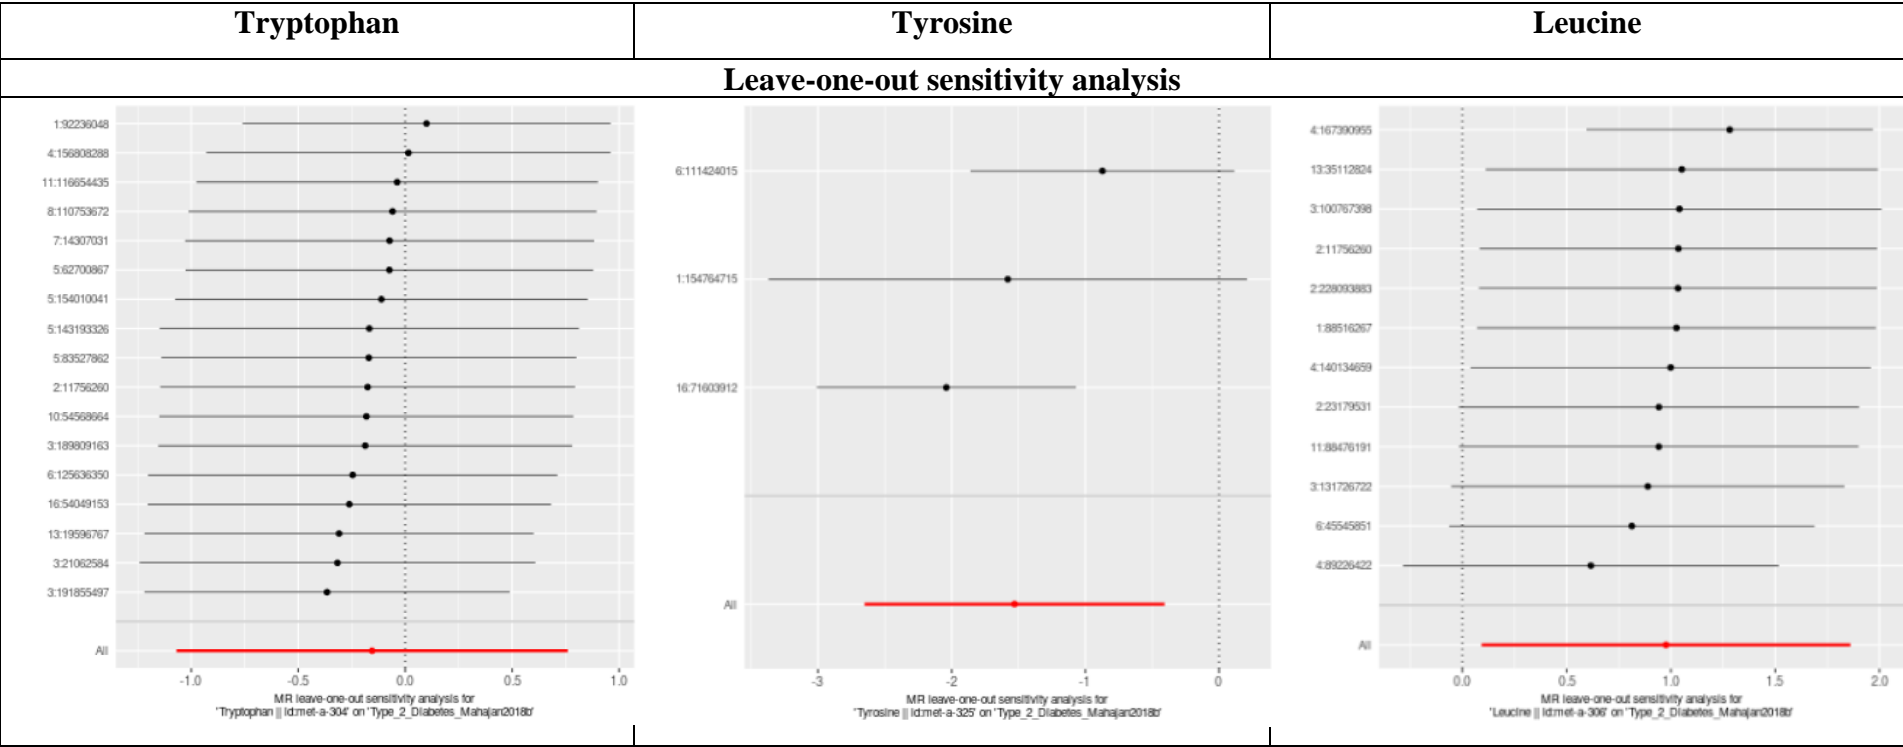

**Table S5 Associations of single genetic instruments used for MR of amino acids traits from Shin et al. and type 2 diabetes**

See Excel file in Supplement B

**Table S6 Direct causal effects of diabetes associated amino acid traits from Shin et al. and type 2 diabetes**

| <b>Amino acid trait*</b> | <b>N(SNPs)**</b> | <b>Beta (SE) from multivariable IVW method for T2DM*</b> | <b>P-Value</b> | <b>Conditional F-statistic***</b> | <b>Beta (95% CI) ****<br/>accounting for weak instruments</b> |
|--------------------------|------------------|----------------------------------------------------------|----------------|-----------------------------------|---------------------------------------------------------------|
| Glycine                  | 1                | 0.05 (0.16)                                              | 0.77           | 0.37                              | 0.04 (-0.79-1.97)                                             |
| Phenylalanine            | 1                | 1.07 (1.30)                                              | 0.41           | 0.53                              | 1.19 (-2.31-4.46)                                             |
| Tryptophan               | 17               | -0.20 (0.70)                                             | 0.77           | 2.02                              | -0.17 (-1.81-1.51)                                            |
| Tyrosine                 | 3                | -1.66 (0.78)                                             | 0.03           | 0.36                              | -1.76 (-3.68--0.03)                                           |
| Leucine                  | 11               | -0.70 (1.56)                                             | 0.65           | 0.31                              | -0.66 (-4.62-2.40)                                            |
| Isoleucine               | 0                | 1.21 (2.27)                                              | 0.59           | 0.08                              | 1.23 (-2.51-5.07)                                             |
| Valine                   | 1                | 1.33 (2.54)                                              | 0.60           | 0.10                              | 1.19 (-2.60-6.96)                                             |

\* assessed using public data by Shin et al. [3] and Mahajan et al. [2]

\*\* significance threshold =  $5 \times 10^{-8}$ ; clumping threshold  $R^2 \geq 0.001$

\*\*\* using covariance matrix from EPIC-Potsdam phenotypes

\*\*\*\* Confidence intervals are calculated using a non-parametric bootstrap with 1000 iterations

**Table S7**Associations of single genetic instruments used for MVMR of amino acids traits from Shin et al. and type 2 diabetes

See Excel file in Supplement B

**Table S8 Total causal effects of tyrosine risk of type 2 diabetes using other public data sources**

| Tyrosine from Kettunen et al. 2016; n=24,925 |      |            |           |           | Tyrosine from Locke et al. 2019; n=8,754 |      |           |           |           |
|----------------------------------------------|------|------------|-----------|-----------|------------------------------------------|------|-----------|-----------|-----------|
| method                                       | nsnp | b          | se        | pval      | method                                   | nsnp | b         | se        | pval      |
| MR Egger                                     | 3    | -0.4225385 | 0.2266672 | 0.3134551 | MR Egger                                 | 3    | 0.2561767 | 0.2200496 | 0.4517975 |
| Weighted median                              | 3    | -0.1176278 | 0.0586697 | 0.0449720 | Weighted median                          | 3    | 0.1617589 | 0.0420126 | 0.0001180 |
| Inverse variance weighted                    | 3    | -0.0951712 | 0.0611713 | 0.1197518 | Inverse variance weighted                | 3    | 0.1587883 | 0.0499333 | 0.0014727 |
| Simple mode                                  | 3    | -0.1142686 | 0.0897026 | 0.3307251 | Simple mode                              | 3    | 0.1900944 | 0.0591888 | 0.0847988 |
| Weighted mode                                | 3    | -0.1366342 | 0.0614610 | 0.1562546 | Weighted mode                            | 3    | 0.1783170 | 0.0552536 | 0.0840818 |

  

| Forest plots                                                                              |  |
|-------------------------------------------------------------------------------------------|--|
| <p>MR effect size for<br/>'Tyrosine    Idmet-c-938' on 'Type_2_Diabetes_Mahajan2018b'</p> |  |
| <p>MR effect size for<br/>'Tyrosine_Locke_2019' on 'Type_2_Diabetes_Mahajan2018b'</p>     |  |

Tyrosine from Kettunen et al. 2016; n=24,925

Tyrosine from Locke et al. 2019; n=8,754

Funnel plots

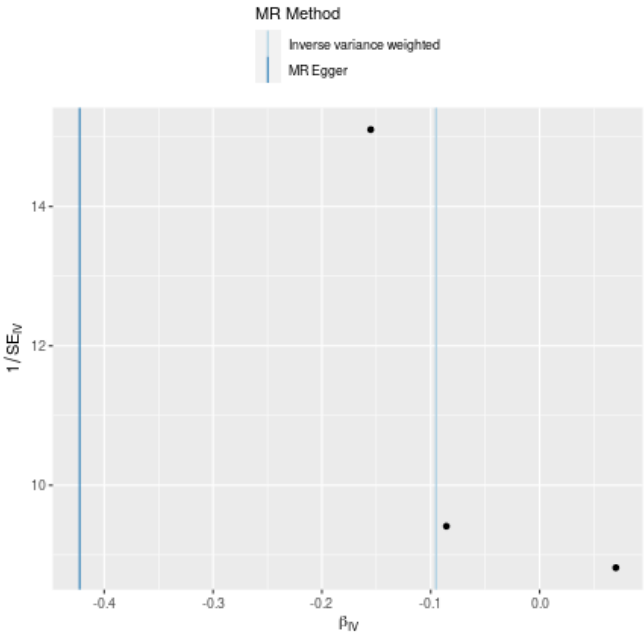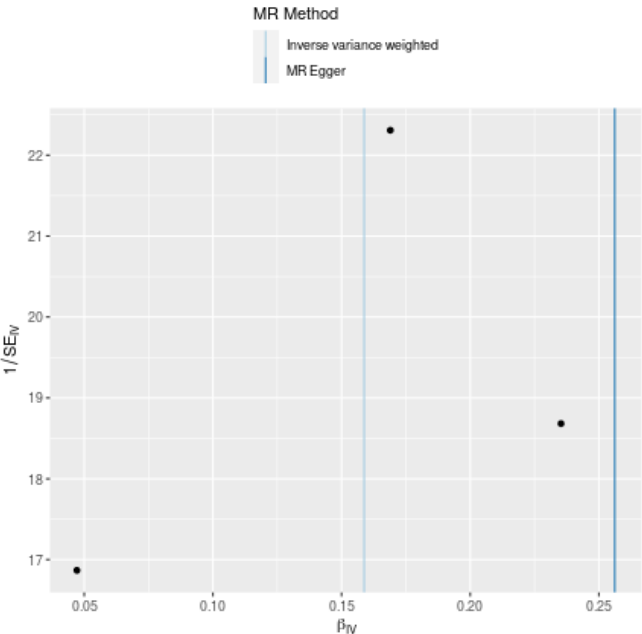

Tyrosine from Kettunen et al. 2016; n=24,925

Tyrosine from Locke et al. 2019; n=8,754

Leave-one-out sensitivity analysis

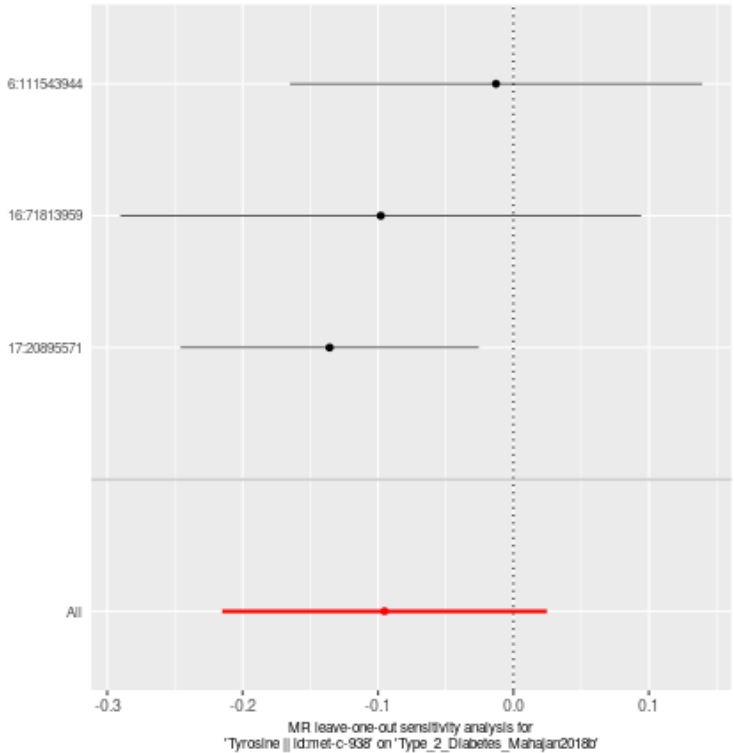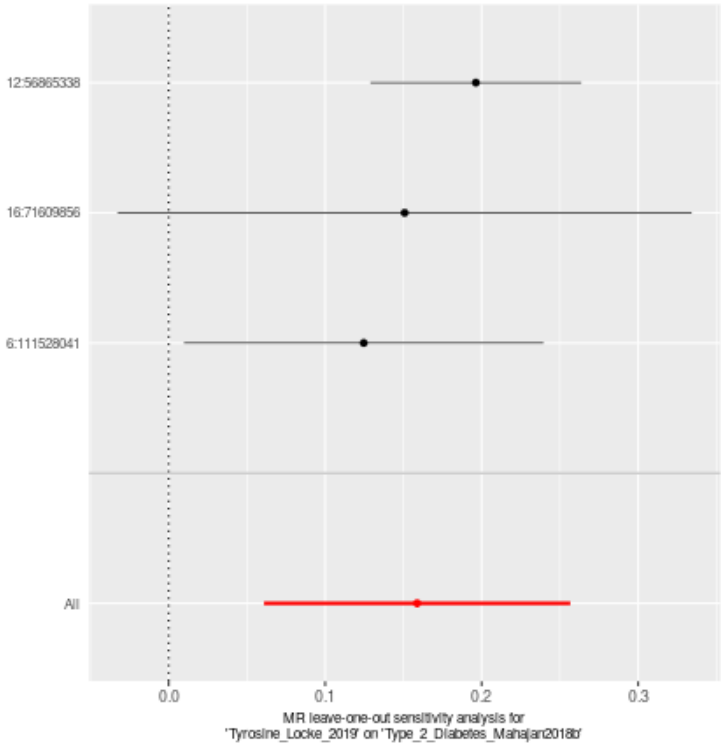

**Table S9 Associations of single genetic instruments used for MR of tyrosine from Kettunen et al. and Locke et al. and type 2 diabetes**

See Excel file in Supplement B



**Table S10 Total causal effects of tyrosine from Shin et al. and other risk factors for type 2 diabetes**

| <b>Outcome</b>                            | <b>Data source*</b> | <b>MR-Base-ID/Author/PMID</b>                | <b>Beta (SE)<br/>from IVW</b> | <b>P-Value</b> | <b>Heterogeneity<br/>Q-statistic,<br/>p-value</b> | <b>Directional horizontal<br/>pleiotropy**<br/>Egger-intercept (SE),<br/>p-value</b> |
|-------------------------------------------|---------------------|----------------------------------------------|-------------------------------|----------------|---------------------------------------------------|--------------------------------------------------------------------------------------|
| BMI                                       | UK Biobank          | ukb-b-19953/ Ben Elsworth                    | -0.26 (0.33)                  | 0.43           | 15.13, 0.001                                      | -0.01 (0.05), 0.91                                                                   |
| Waist circumference                       | UK Biobank          | ukb-b-9405/ Ben Elsworth                     | -0.03 (0.25)                  | 0.91           | 10.76, 0.005                                      | 0.0003 (0.04), 0.995                                                                 |
| Fasting blood glucose                     | MAGIC               | ebi-a-GCST000568/ Dupuis 2010/<br>20081858   | -0.39 (0.22)                  | 0.08           | 1.58, 0.45                                        | 0.02 (0.03), 0.66                                                                    |
| Fasting blood glucose<br>adjusted for BMI | MAGIC               | ebi-a-GCST005186/ Manning<br>2012/ 22581228  | -0.68 (0.26)                  | 0.008          | 3.91, 0.14                                        | -0.02 (0.03), 0.58                                                                   |
| Blood glucose                             | UK Biobank          | ukb-d-30740_irnt/ Neale Lab                  | -0.43 (0.15)                  | 0.004          | 0.06, 0.97                                        | 0.0007 (0.02), 0.97                                                                  |
| Fasting blood insulin                     | MAGIC               | ebi-a-GCST000571/ Dupuis J<br>2010/ 20081858 | -0.16 (0.23)                  | 0.50           | 1.14, 0.57                                        | 0.02 (0.03), 0.63                                                                    |
| Fasting blood insulin<br>adjusted for BMI | MAGIC               | ebi-a-GCST005185/ Manning<br>2012/ 22581228  | -0.01 (0.19)                  | 0.95           | 0.73, 0.70                                        | 0.02 (0.02), 0.56                                                                    |

IVW, inverse variance weighted method; PMID, Pubmed identifier; SE, standard error;  
Tyrosine was instrumented by three variants from Shin et al. [3] (see Table S3/S4)

\*accessed via MR-Base platform [4]

\*\* assessed by MR-Egger (>2 variants needed)

**Table S11 Instruments from genetic risk score for insulin resistance\***

| <b>SNP*</b> | <b>Chr:Position</b> | <b>Gene</b>                | <b>Effect allele</b> | <b>Other allele</b> | <b>EAF**</b> | <b>Beta**</b> | <b>SE**</b> | <b>P-Value**</b> |
|-------------|---------------------|----------------------------|----------------------|---------------------|--------------|---------------|-------------|------------------|
| rs4846565   | 1:219722104         | <i>LYPLAL1</i>             | G                    | A                   | 0.690        | 0.015         | 0.0026      | 2.01E-08         |
| rs10195252  | 2:165513091         | <i>GRB14</i>               | C                    | T                   | 0.442        | -0.016        | 0.0026      | 4.87E-10         |
| rs2943645   | 2:227099180         | <i>IRS1</i>                | C                    | T                   | 0.372        | -0.013        | 0.0025      | 1.37E-07         |
| rs17036328  | 3:12390484          | <i>PPARG</i>               | T                    | C                   | 0.903        | 0.015         | 0.0036      | 1.92E-05         |
| rs6822892   | 4:157734675         | <i>PDGFC</i>               | A                    | C/G                 | 0.646        | 0.011         | 0.0025      | 3.16E-05         |
| rs3822072   | 4:89741269          | <i>FAM13A1</i>             | G                    | A                   | 0.455        | -0.0092       | 0.0024      | 1.19E-04         |
| rs4865796   | 5:53272664          | <i>ARL15</i>               | A                    | G                   | 0.708        | 0.015         | 0.0026      | 2.09E-08         |
| rs459193    | 5:55806751          | <i>ANKRD55/<br/>MAP3K1</i> | G                    | A                   | 0.783        | 0.014         | 0.0027      | 6.57E-08         |
| rs2745353   | 6:127452935         | <i>RSPO3</i>               | T                    | C                   | 0.550        | 0.014         | 0.0025      | 5.48E-09         |
| rs731839    | 19:33899065         | <i>PEPD</i>                | A                    | G                   | 0.659        | -0.014        | 0.0026      | 1.72E-08         |

EAF, effect allele frequency; SE, standard error; T2DM, type 2 diabetes

\* GRS for Insulin resistance [5]

\*\*GWAS data from MAGIC on fasting insulin [6]

**Table S12 Total causal effects of insulin resistance on amino acid traits from EPIC-Potsdam**

| Amino acid trait              | N (SNPs) <sup>a</sup> | Beta (SE)<br>from IVW | P-Value      | Heterogeneity<br>between SNPs;<br><br>Q-statistic, p-<br>value | Directional horizontal<br>pleiotropy <sup>b</sup> ;<br><br>Egger-intercept (SE), p-value | Outlier<br>detected    |
|-------------------------------|-----------------------|-----------------------|--------------|----------------------------------------------------------------|------------------------------------------------------------------------------------------|------------------------|
| <b>Glycine</b>                | 9/10                  | -0.354 (0.756)        | 0.640        | no; 7.57, 0.48                                                 | no; 0.04 (0.08), 0.65                                                                    | no                     |
| <b>Glycine/Serine</b>         | 9/10                  | 1.167 (0.756)         | 0.123        | no; 5.06, 0.75                                                 | no; 0.12 (0.08), 0.12                                                                    | no                     |
| <b>Phenylalanine</b>          | 9/10                  | 0.155 (0.855)         | 0.856        | no; 10.13, 0.26                                                | no; -0.04 (0.09), 0.70                                                                   | no                     |
| <b>Phenylalanine/Arginine</b> | 9/10                  | 1.592 (0.927)         | 0.086        | no; 11.95, 0.15                                                | no; 0.10 (0.09), 0.30                                                                    | no                     |
| <b>Serine/Phenylalanine</b>   | 9/10                  | -1.895 (0.862)        | <b>0.028</b> | no; 10.85, 0.21                                                | no; -0.06 (0.09), 0.50                                                                   | no                     |
| <b>Tryptophan/Glutamine</b>   | 9/10                  | 0.080 (0.750)         | 0.915        | no; 7.85, 0.45                                                 | no; -0.01 (0.08), 0.90                                                                   | no                     |
| <b>Tyrosine/Tryptophan</b>    | 9/10                  | 0.515 (0.748)         | 0.491        | no; 4.66, 0.79                                                 | no; 0.03 (0.07), 0.71                                                                    | no                     |
| <b>Tyrosine/Methionine</b>    | 9/10                  | 1.486 (0.744)         | <b>0.046</b> | no; 3.63, 0.89                                                 | no; -0.01 (0.07), 0.93                                                                   | no                     |
| <b>xLeucine/Methionine</b>    | 9/10                  | 1.626 (0.864)         | 0.060        | no; 10.90, 0.21                                                | no; -0.01 (0.09), 0.89                                                                   | Yes<br><br>(rs2943645) |

|                        |      |                |       |                 |                         |    |
|------------------------|------|----------------|-------|-----------------|-------------------------|----|
|                        | 8/9  | 0.974 (0.783)  | 0.213 | no; 4.31, 0.74  | no; -0.052 (0.08), 0.49 | no |
| <b>Valine/xLeucine</b> | 9/10 | -0.975 (0.916) | 0.287 | no; 11.84, 0.16 | no; 0.04 (0.10), 0.72   | no |

IVW, inverse variance weighted method; SE, standard error; xLeu = Isoleucine + Leucine

<sup>a</sup> used instruments/suitable instruments available in the GWAS of amino acid trait; rs6822892 excluded as triallelic variant;

<sup>b</sup> assessed by MR-Egger (>2 variants needed)

**Table S13 Associations of single genetic instruments used for MR of insulin resistance and amino acids traits from EPIC-Potsdam**

See Excel file in Supplement B

**Table S14 Total causal effects of insulin resistance and single amino acids**

| <b>Amino acid trait*</b> | <b>N (SNPs)**</b> | <b>Beta (SE) from IVW method</b> | <b>P-Value</b> | <b>Heterogeneity;<br/>Q-statistic,<br/>p-value</b> | <b>Directional horizontal<br/>pleiotropy***<br/>Egger-intercept (SE), p-<br/>value</b> |
|--------------------------|-------------------|----------------------------------|----------------|----------------------------------------------------|----------------------------------------------------------------------------------------|
| EPIC-Potsdam             |                   |                                  |                |                                                    |                                                                                        |
| Serine                   | 9/10              | -1.75 (0.75)                     | 0.02           | no; 7.54, 0.48                                     | -0.091 (0.075), 0.22                                                                   |
| Tyrosine                 | 9/10              | 0.29 (0.81)                      | 0.72           | no; 9.38, 0.31                                     | -0.016 (0.086), 0.85                                                                   |
| Methionine               | 9/10              | -0.96 (0.76)                     | 0.21           | no; 6.49, 0.59                                     | -0.015 (0.075), 0.84                                                                   |
| Shin et al [3]           |                   |                                  |                |                                                    |                                                                                        |
| Serine                   | 9/10              | -0.07 (0.06)                     | 0.21           | no; 2.64, 0.95                                     | -0.002 (0.006), 0.73                                                                   |
| Phenylalanine            | 9/10              | 0.003 (0.03)                     | 0.92           | no; 4.64, 0.80                                     | 0.001 (0.003), 0.87                                                                    |
| Tyrosine                 | 9/10              | 0.05 (0.04)                      | 0.20           | no; 8.78, 0.36                                     | 0.001 (0.005), 0.88                                                                    |
| Methionine               | 9/10              | -0.02 (0.04)                     | 0.65           | no; 9.92, 0.27                                     | 0.003 (0.004), 0.53                                                                    |

IVW, inverse variance weighted method; SE, standard error

\* single amino acids from ratios, showing causal influence by insulin resistance in EPIC-Potsdam

\*\* used instruments/suitable instruments available in the GWAS of single amino acids; rs6822892 excluded as triallelic variant

**Table S15 Associations of single genetic instruments used for MR of insulin resistance and single amino acids**

See Excel file in Supplement B

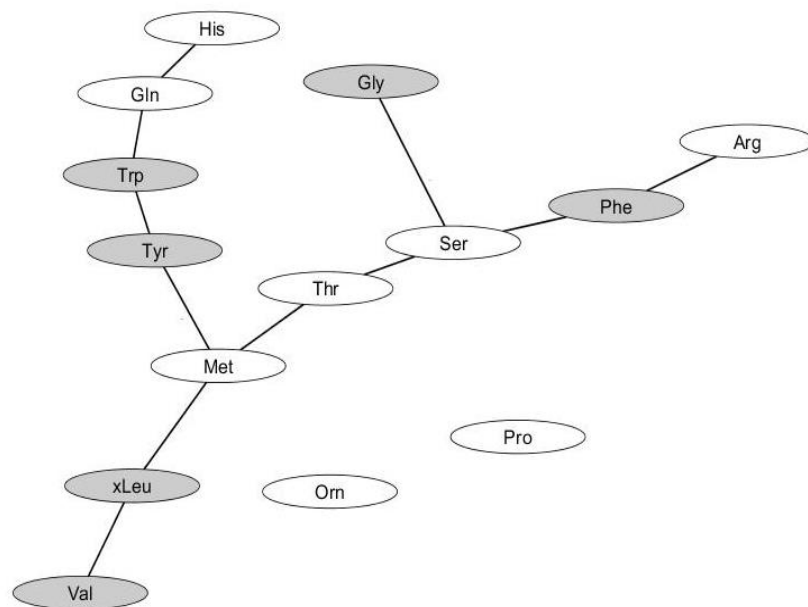

### Amino acid traits tested within this study:

|                        |          |
|------------------------|----------|
| Glycine                | Gly      |
| Phenylalanine          | Phe      |
| Glycine/Serine         | Gly/Ser  |
| Serine/Phenylalanine   | Ser/Phe  |
| Phenylalanine/Arginine | Phe/Arg  |
| Valine/xLeucine        | Val/xLeu |
| xLeucine/Methionine    | xLeu/Met |
| Tyrosine/Methionine    | Tyr/Met  |
| Tyrosine/Tryptophan    | Tyr/Trp  |
| Tryptophan/Glutamine   | Trp/Glu  |

**Figure S1 Network structure of amino acids within EPIC-Potsdam**

Diabetes-associated amino acids are depicted in grey ellipses; solid line indicates direct association between amino acids, GGM network was adapted from the publication by A. Floegel *et al.* [7] and drawn by using Cytoscape Software v3.2.1 [8]

xLeucine = Isoleucine + Leucine



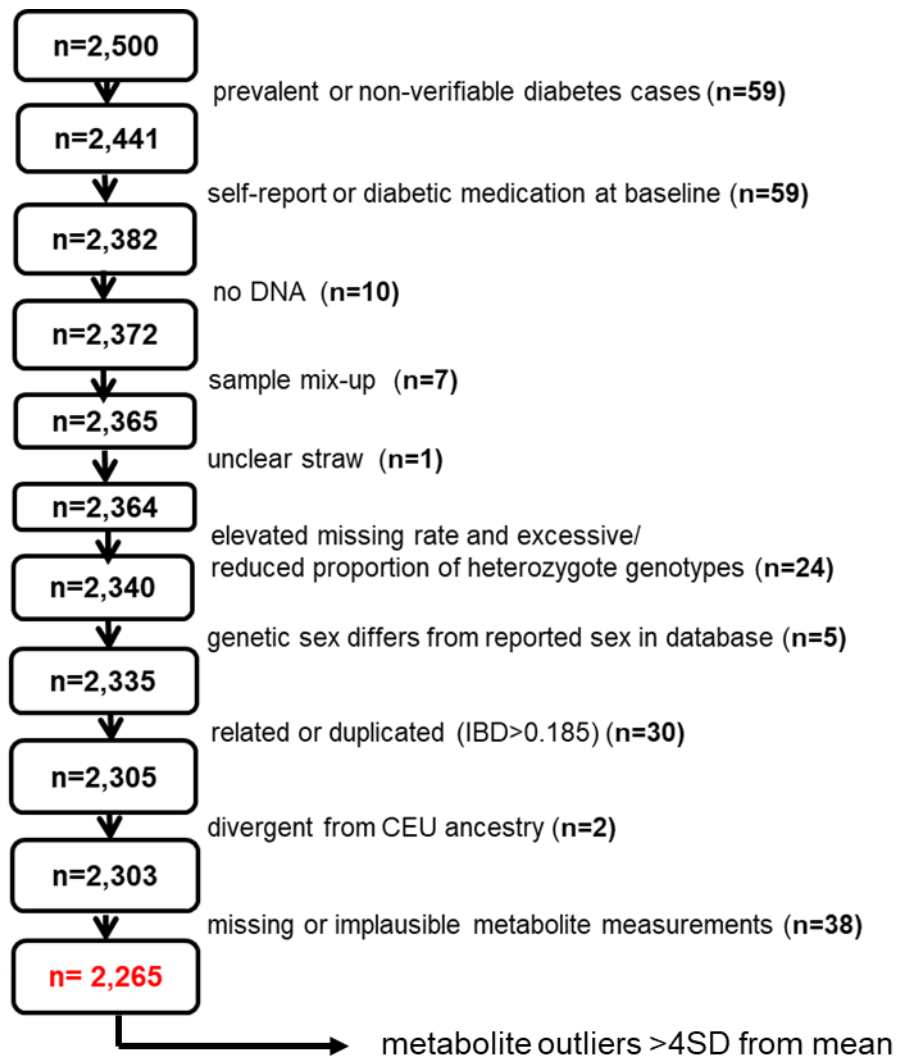

**Figure S2 Flow-chart of final study population in EPIC-Potsdam**

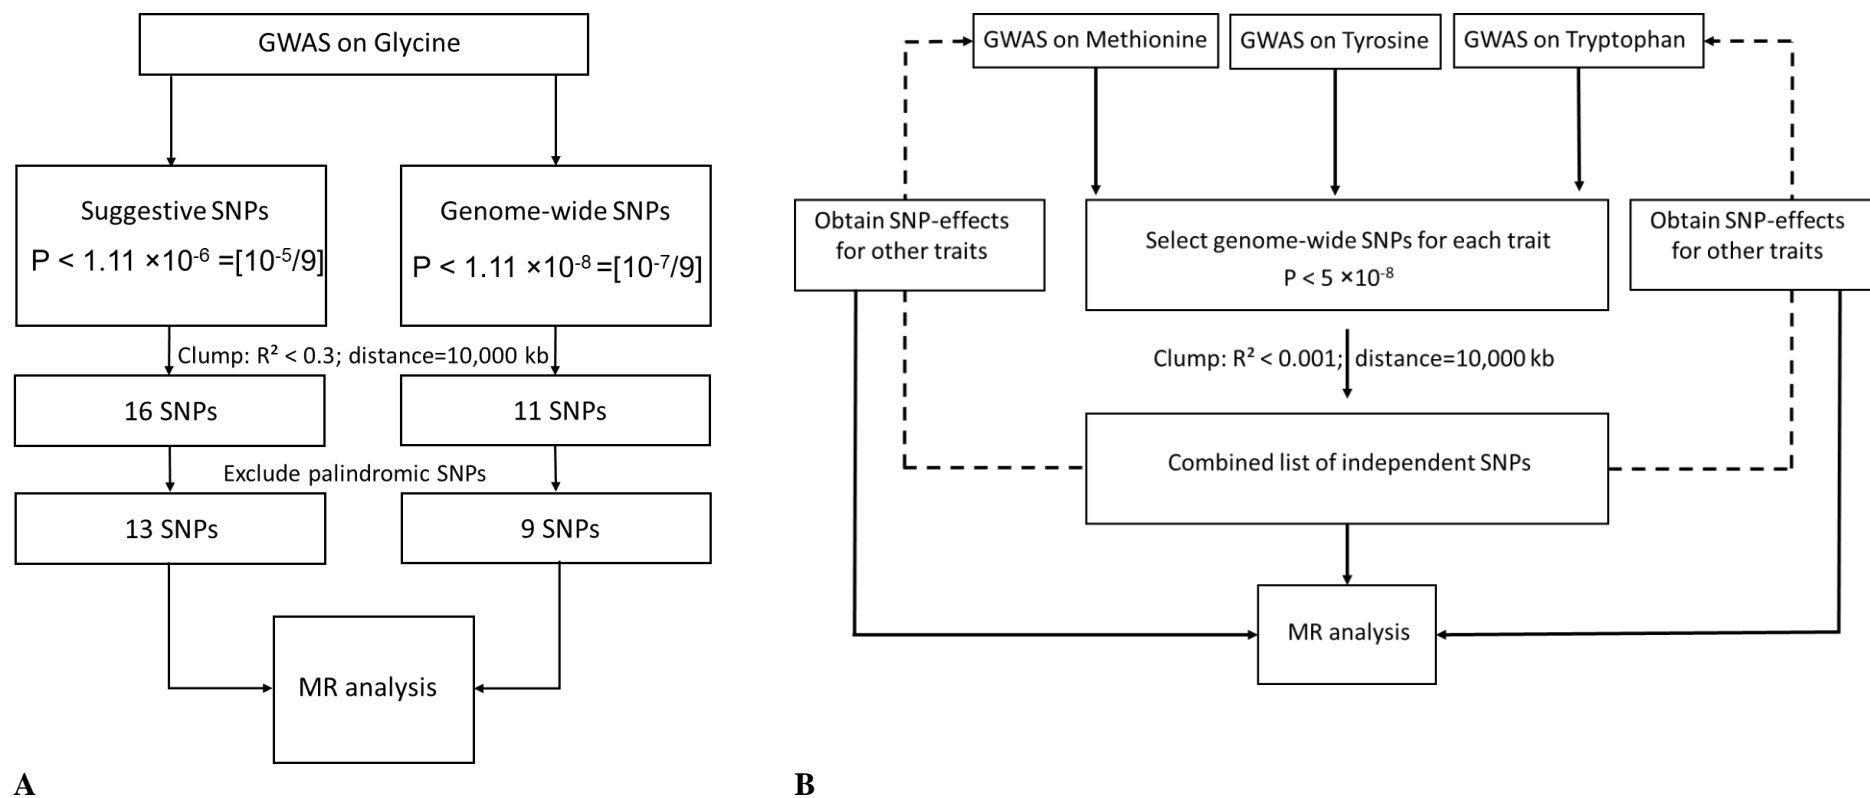

**Figure S3 Example flow charts of inclusion and exclusion of SNPs into the analysis**

**A** univariable MR: First, we restricted to the set of SNPs according to the suggestive or genome-wide significance threshold. Next, we clumped the SNP list with thresholds  $R^2 \leq 0.3$  or  $R^2 \leq 0.001$  to receive independent instruments. **B** multivariable MR: First, we restricted to the set of SNPs according to the genome-wide significance threshold for each exposure. Next, we clumped the SNP list with thresholds  $R^2 \leq 0.001$  to receive independent instruments and obtained associations with the other exposures. In MR analysis, palindromic SNPs were excluded.

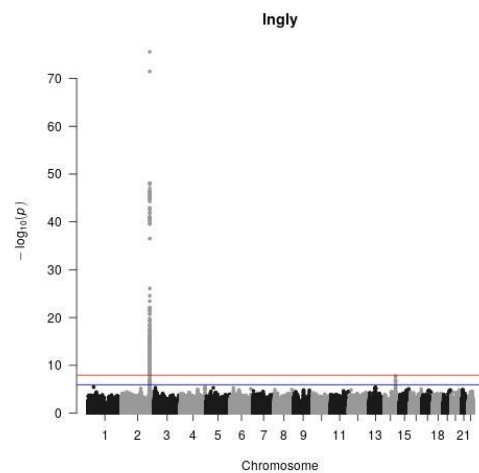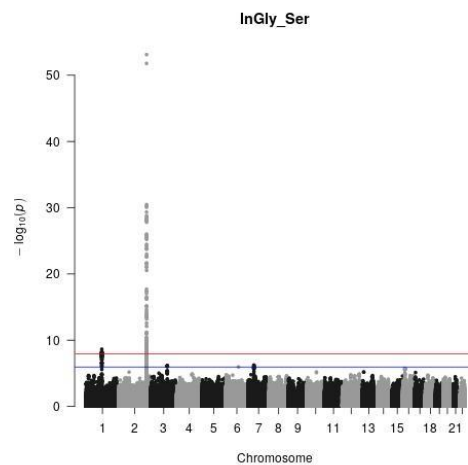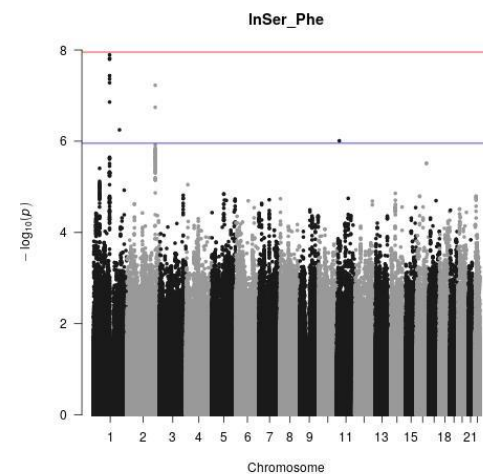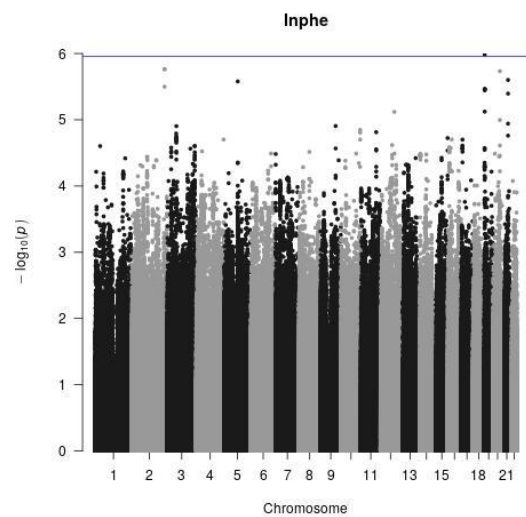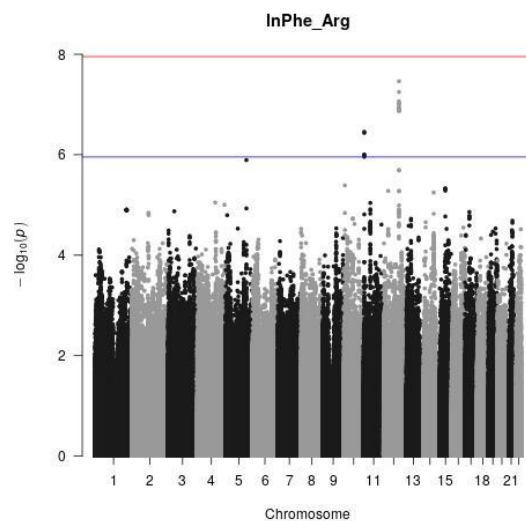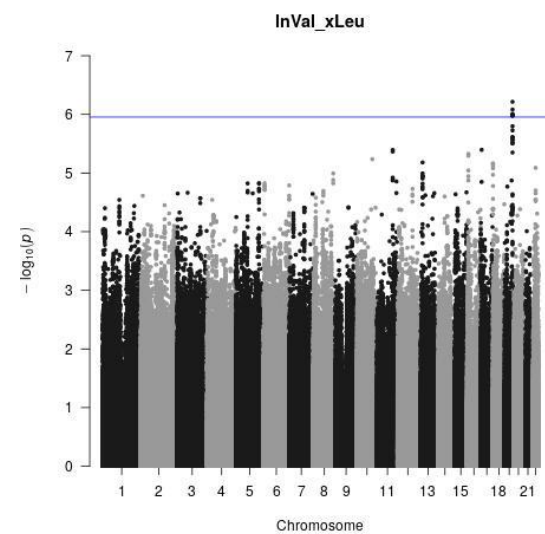

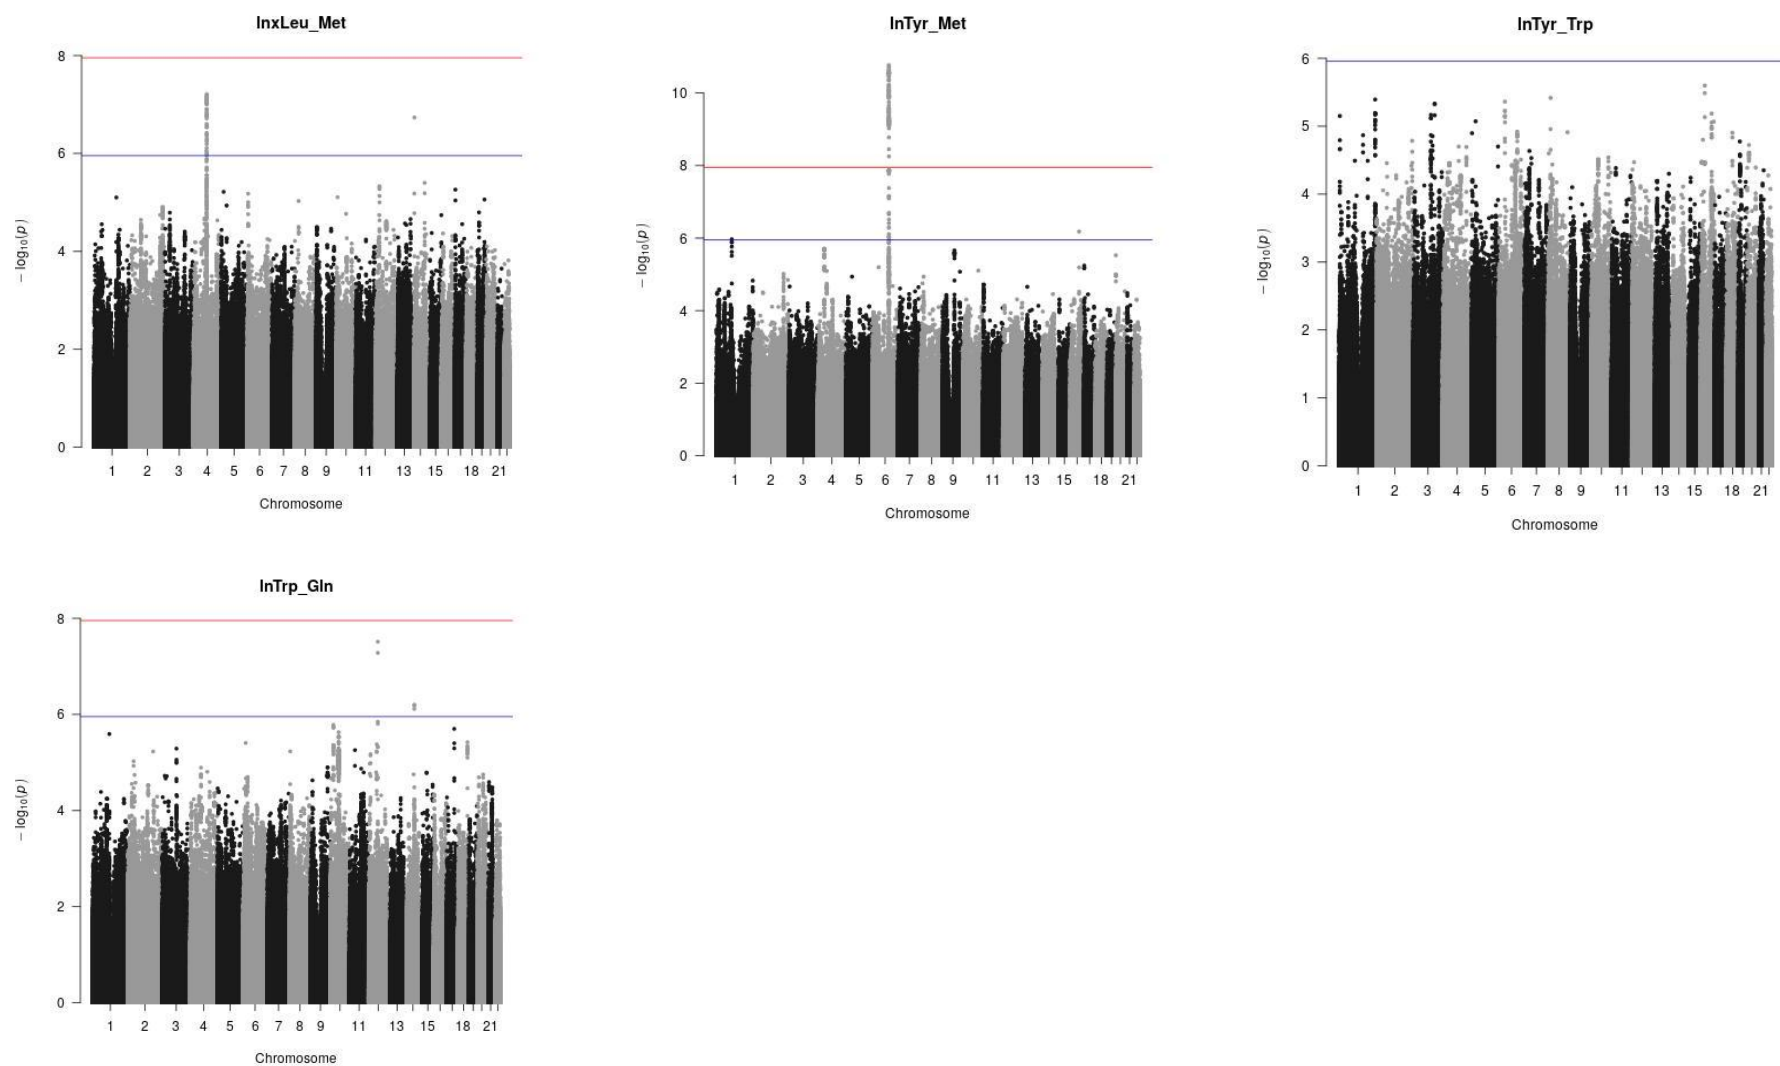

**Figure S4** Manhattan plots visualizing GWAS results for amino acid traits in EPIC-Potsdam

Blue line indicates suggestive significance threshold ( $P < 1.11 \times 10^{-6}$ ), orange line indicates genome-wide significance threshold ( $P < 1.11 \times 10^{-8}$ )

## References

1. Mahajan, A.; Taliun, D.; Thurner, M.; Robertson, N.R.; Torres, J.M.; Rayner, N.W.; Steinthorsdottir, V.; Scott, R.A.; Grarup, N.; Cook, J.P., et al. Fine-mapping of an expanded set of type 2 diabetes loci to single-variant resolution using high-density imputation and islet-specific epigenome maps **2018**, 10.1101/245506, doi:10.1101/245506.
2. Mahajan, A.; Taliun, D.; Thurner, M.; Robertson, N.R.; Torres, J.M.; Rayner, N.W.; Payne, A.J.; Steinthorsdottir, V.; Scott, R.A.; Grarup, N., et al. Fine-mapping type 2 diabetes loci to single-variant resolution using high-density imputation and islet-specific epigenome maps. *Nat Genet* **2018**, *50*, 1505-1513, doi:10.1038/s41588-018-0241-6.
3. Shin, S.-Y.; Fauman, E.B.; Petersen, A.-K.; Krumsiek, J.; Santos, R.; Huang, J.; Arnold, M.; Erte, I.; Forgetta, V.; Yang, T.-P., et al. An atlas of genetic influences on human blood metabolites. *Nature Genetics* **2014**, *46*, 543-550, doi:10.1038/ng.2982.
4. Hemani, G.; Zheng, J.; Elsworth, B.; Wade, K.H.; Haberland, V.; Baird, D.; Laurin, C.; Burgess, S.; Bowden, J.; Langdon, R., et al. The MR-Base platform supports systematic causal inference across the human phenome. *Elife* **2018**, *7*, doi:10.7554/eLife.34408.
5. Scott, R.A.; Fall, T.; Pasko, D.; Barker, A.; Sharp, S.J.; Arriola, L.; Balkau, B.; Barricarte, A.; Barroso, I.; Boeing, H., et al. Common genetic variants highlight the role of insulin resistance and body fat distribution in type 2 diabetes, independent of obesity. *Diabetes* **2014**, *63*, 4378-4387, doi:10.2337/db14-0319.
6. Scott, R.A.; Lagou, V.; Welch, R.P.; Wheeler, E.; Montasser, M.E.; Luan, J.; Magi, R.; Strawbridge, R.J.; Rehnberg, E.; Gustafsson, S., et al. Large-scale association analyses identify new loci influencing glycemic traits and provide insight into the underlying biological pathways. *Nat Genet* **2012**, *44*, 991-1005, doi:10.1038/ng.2385.
7. Floegel, A.; Wientzek, A.; Bachlechner, U.; Jacobs, S.; Drogan, D.; Prehn, C.; Adamski, J.; Krumsiek, J.; Schulze, M.B.; Pischon, T., et al. Linking diet, physical activity, cardiorespiratory fitness and obesity to serum metabolite networks: findings from a population-based study. *International Journal of Obesity* **2014**, *38*, 1388-1396, doi:10.1038/ijo.2014.39.
8. Shannon, P.; Markiel, A.; Ozier, O.; Baliga, N.S.; Wang, J.T.; Ramage, D.; Amin, N.; Schwikowski, B.; Ideker, T. Cytoscape: a software environment for integrated models of biomolecular interaction networks. *Genome Res* **2003**, *13*, 2498-2504, doi:10.1101/gr.1239303.
